# Supplementary material
Source: publisher figshare collection journal article supplement (https://tandf.figshare.com/articles/dataset/_/6969434)

# Molecular Docking revealed binding of Anti-Hepatitis C Virus drugs to Zika Viral polymerase solved structures

*Abdo A Elfiky*<sup>a, b, c \*</sup> and *Alaa M Ismail*<sup>a, d</sup>

<sup>a</sup> Biophysics Department, Faculty of Sciences, Cairo University, Giza, Egypt. (P.O. BOX. 12613)

<sup>b</sup> Quantitative Life Science section, The Abdus Salam International Center for Theoretical Physics (ICTP), Strada Costiera, 11 I34151, Trieste, Italy.

<sup>c</sup> Faculty of Pharmacy and Pharmaceutical Sciences, University of Alberta (T6G 2H7), Edmonton, AB, Canada.

<sup>d</sup> Biochemistry Department, Faculty of Medicine and Dentistry, University of Alberta (T6G 2R3), Edmonton, AB, Canada.

**Figure S2:** Binding affinities for GTP and some nucleotide inhibitors to ZIKV NS5 model at different time points during the course of MDS.

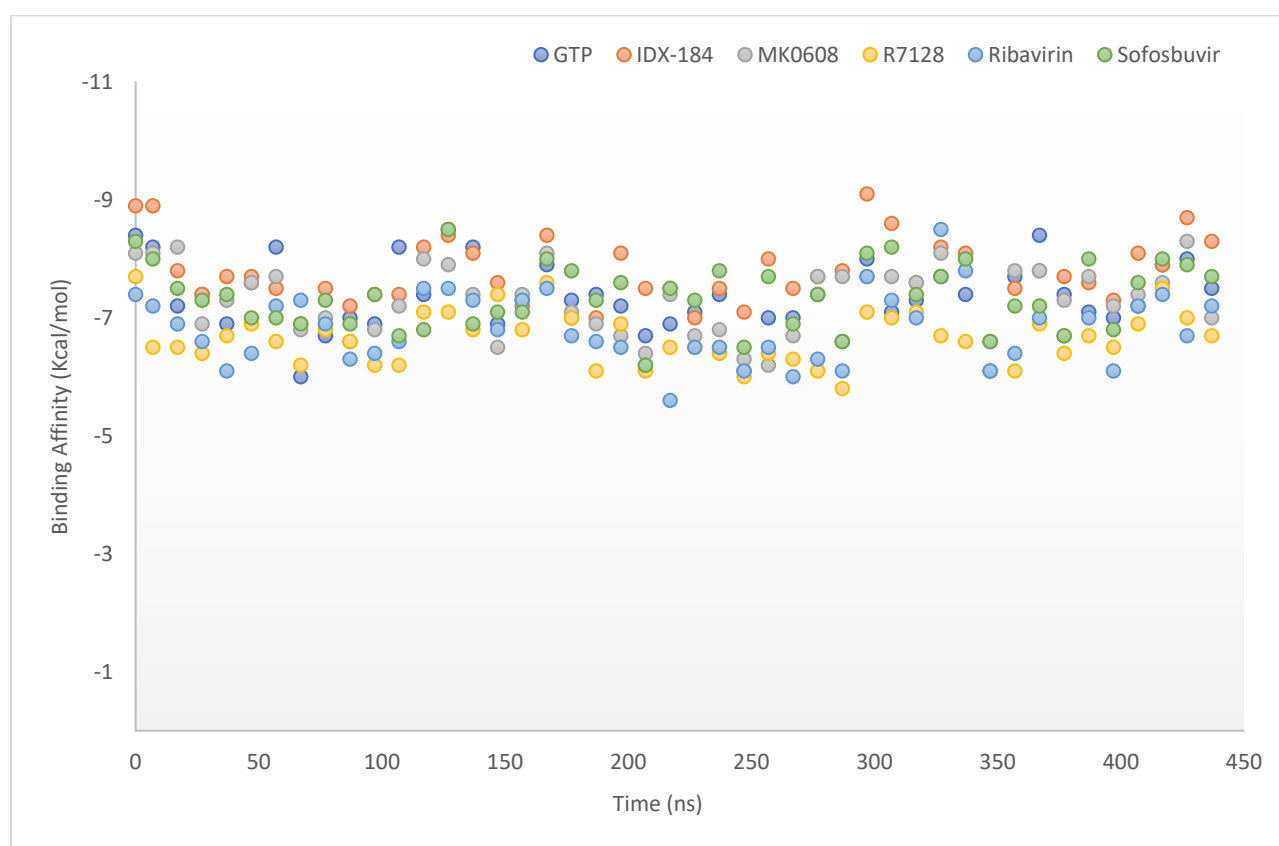

Supplement: Supplementary file 1 [file 1]
