# Supplementary material
Source: publisher figshare collection journal article supplement (https://tandf.figshare.com/articles/dataset/_/6969434)
Supplement: Supplementary file 2 [file 1]

# Molecular Docking revealed binding of Anti-Hepatitis C Virus drugs to Zika Viral polymerase solved structures

*Abdo A Elfiky*<sup>a, b, c \*</sup> and *Alaa M Ismail*<sup>a, d</sup>

<sup>a</sup> Biophysics Department, Faculty of Sciences, Cairo University, Giza, Egypt. (P.O. BOX. 12613)

<sup>b</sup> Quantitative Life Science section, The Abdus Salam International Center for Theoretical Physics (ICTP), Strada Costiera, 11 I34151, Trieste, Italy.

<sup>c</sup> Faculty of Pharmacy and Pharmaceutical Sciences, University of Alberta (T6G 2H7), Edmonton, AB, Canada.

<sup>d</sup> Biochemistry Department, Faculty of Medicine and Dentistry, University of Alberta (T6G 2R3), Edmonton, AB, Canada.

**Figure S1:** 2D structures of the nucleotide/side used in the docking study. Structures are represented using Maestro software. Different colors represent different atoms. Gray, red blue, violet, yellow and green represent Carbon, Oxygen, Nitrogen, Phosphorus, sulfur and Florine atoms, respectively.

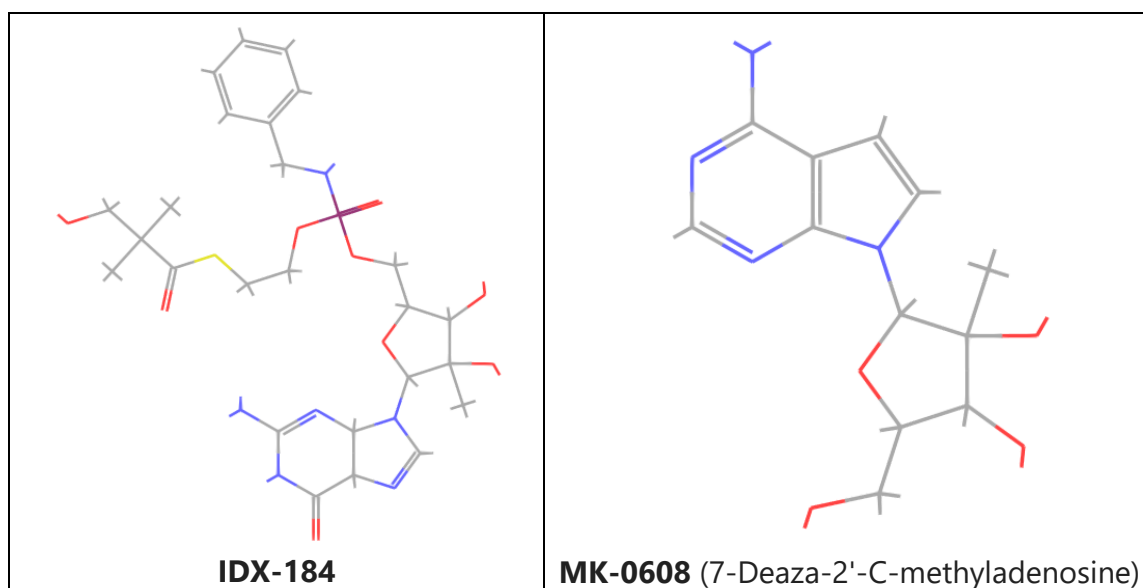

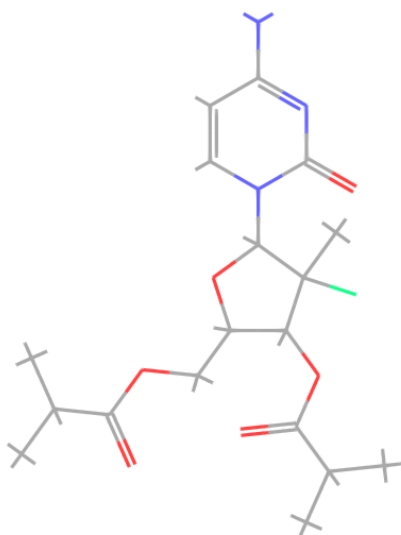

**Mericitabine** (R7128)

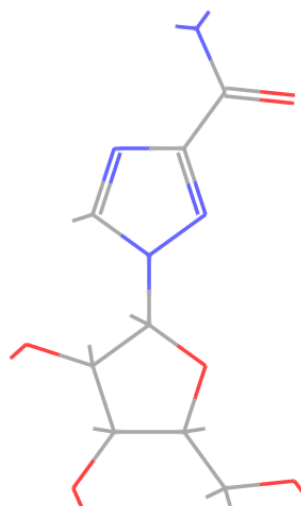

**Ribavirin**

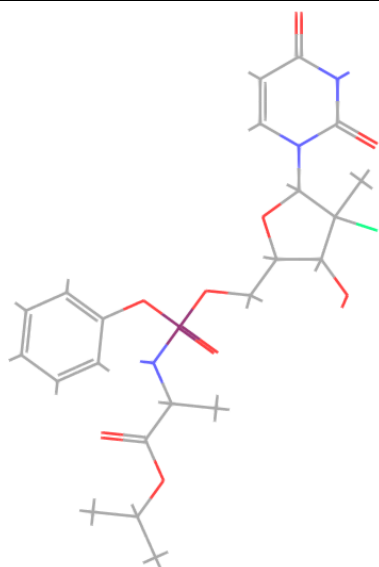

**Sofosbuvir** (PSI-7977)

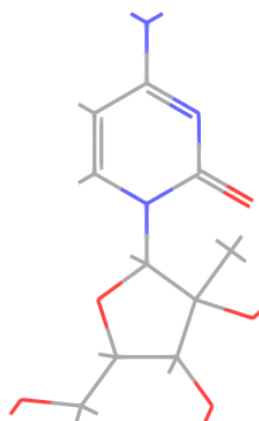

**2'-C-methylcytidine** (NM107)

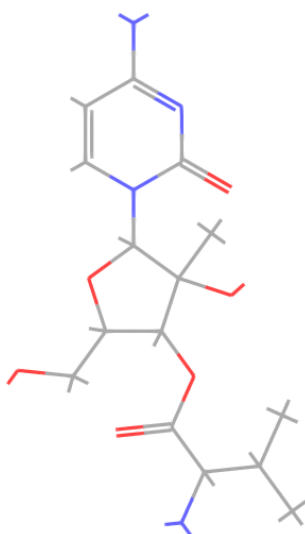

**Valopicitabine** (NM-283)

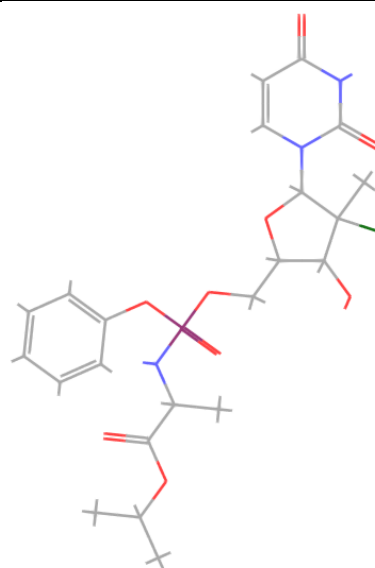

**Uprifosbuvir** (MK-3682)

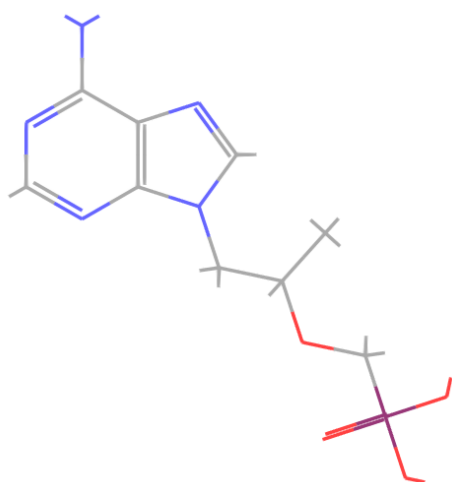

**Tenofovir** ((R)-9-(2-Phosphonomethoxypropyl)adenine)

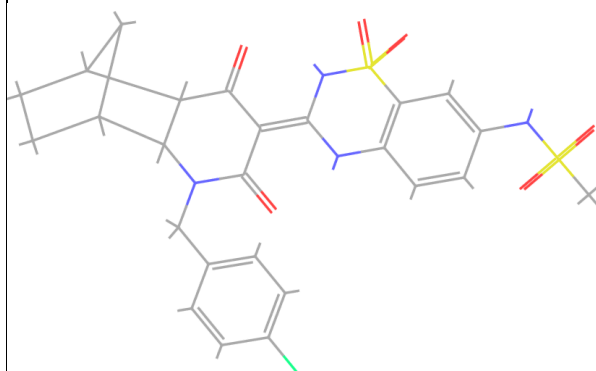

**Setrobuvir** (ANA-598)

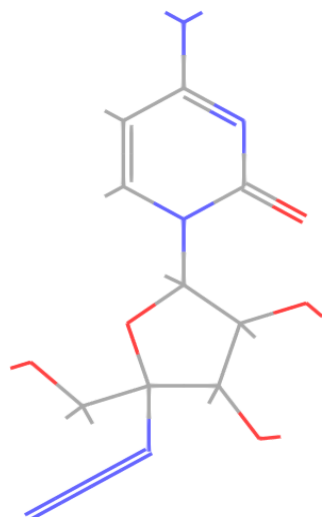

**R1479** (4'-Azidocytidine)

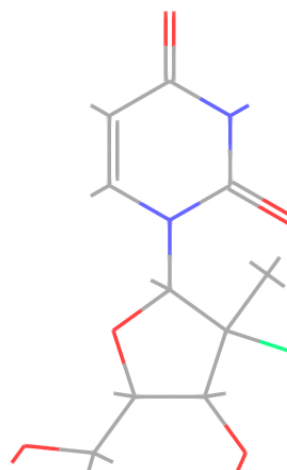

**PSI-6206** (2'-Deoxy-2'-fluoro-2'-methyluridine)

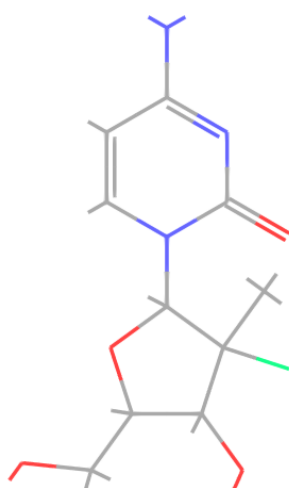

**PSI-6130** (2'-Deoxy-2'-fluoro-2'-C-methylcytidine)

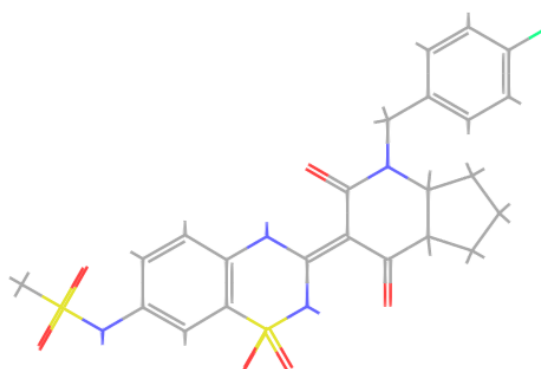

**YAK** (N-[3-[(4aR,7aS)-1-[(4-fluorophenyl)methyl]-2,4-dioxo-5,6,7,7a-tetrahydro-4aH-cyclopenta[b]pyridin-3-ylidene]-1,1-dioxo-4H-1,2,4-benzothiadiazin-7-yl]methanesulfonamide)

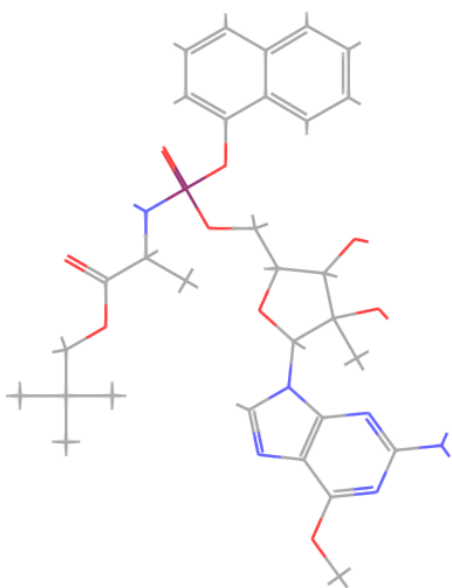

**BMS-986094** (L-Alanine, N-(2'-C-methyl-6-O-methyl-P-1-naphthalenyl-5'-guanylyl)-, 2,2-dimethylpropyl ester)

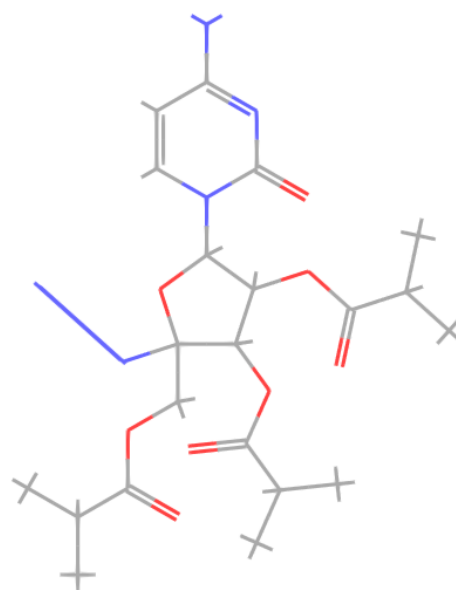

**Balapiravir** (R-1626)
